# Supplementary material for: Association of Genes, Pathways, and Haplogroups of the Mitochondrial Genome with the Risk of Colorectal Cancer: The Multiethnic Cohort
Source: PLoS One. 2015 Sep 4;10(9):e0136796. doi: 10.1371/journal.pone.0136796 (PMC4560485; doi:10.1371/journal.pone.0136796)
Supplement: S1 Table — (XLSX) [file pone.0136796.s001.xlsx]

## Sheet: S1Table
S1 Table. 185 mtSNPs tested in 2,453 colorectal cancer cases and 11,930 controls
			African American		Asian American		Latinos		Whites		Native Hawaiian		Overall
SNP	Locus	Function	Minor allele	MAF*	Minor allele	MAF*	Minor allele	MAF*	Minor allele	MAF*	Minor allele	MAF*	Minor allele	MAF*
mt663	rRNA	--	G	0.003307	G	0.0608	G	0.3596	G	0.01589	--	--	G	0.09316
mt709	rRNA	--	A	0.1753	A	0.1591	A	0.04626	A	0.1583	--	--	A	0.1325
mt769	rRNA	--	G	0.4409	--	--	A	0.02794	A	0.01589	--	--	A	0.1519
mt825	rRNA	--	A	0.2505	--	--	A	0.01143	A	0.007361	--	--	A	0.06777
mt827	rRNA	--	G	0.001988	G	0.05281	G	0.2386	G	0.01167	--	--	G	0.06518
mt930	rRNA	--	A	0.006614	A	0.001815	A	0.002117	A	0.05039	--	--	A	0.01358
mt1018	rRNA	--	G	0.4418	--	--	--	0.03843	A	0.01748	--	--	A	0.1543
mt1185	rRNA	--	--	--	--	--	--	--	T	0.002326	T	0.3552	T	0.01827
mt1382	rRNA	--	--	--	C	0.06337	--	--	--	--	C	0.005051	C	0.01788
mt1438	rRNA	--	A	0.09967	A	0.007264	A	0.01227	A	0.02868	--	--	A	0.03607
mt1598	rRNA	--	A	0.002981	A	0.03238	A	0.02541	A	0.006979	--	--	A	0.01628
mt1692	rRNA	--	--	--	--	--	--	--	--	--	G	0.3074	G	0.01555
mt1706	rRNA	--	T	0.04929	--	--	T	0.00127	--	--	--	--	T	0.01275
mt1719	rRNA	--	A	0.02282	A	0.006048	A	0.007197	A	0.05666	--	--	A	0.0213
mt1736	rRNA	--	G	0.003315	G	0.06018	G	0.3565	G	0.01627	--	--	G	0.09221
mt1738	rRNA	--	C	0.09395	--	--	C	0.01017	C	0.005816	--	--	C	0.02709
mt1811	rRNA	--	G	0.004962	--	--	G	0.02119	G	0.1297	--	--	G	0.0339
mt1888	rRNA	--	A	0.01092	A	0.001211	A	0.08733	A	0.09879	--	--	A	0.04199
mt2092	rRNA	--	T	0.001659	--	--	T	0.05942	T	0.002718	--	--	T	0.01278
mt2332	rRNA	--	T	0.1037	--	--	T	0.00508	T	0.001165	--	--	T	0.0277
mt2352	rRNA	--	C	0.2709	--	--	C	0.01398	C	0.01163	--	--	C	0.07447
mt2416	rRNA	--	C	0.2998	C	0.003633	C	0.01609	C	0.009709	C	0.3086	C	0.09826
mt2626	rRNA	--	C	0.002314	C	0.1442	--	--	C	0.00194	C	0.006734	C	0.04159
mt2706	rRNA	--	A	0.01322	A	0.006354	A	0.05975	A	0.4014	A	0.008446	A	0.1045
mt2758	rRNA	--	A	0.2488	--	--	A	0.01144	A	0.007373	--	--	A	0.06741
mt2768	rRNA	--	G	0.09103	--	--	G	0.004655	G	0.005037	--	--	G	0.02509
mt2772	rRNA	--	--	--	T	0.1416	--	--	--	--	T	0.006734	T	0.04
mt2789	rRNA	--	T	0.1897	--	--	T	0.0107	T	0.006656	--	--	T	0.0522
mt2885	rRNA	--	C	0.2504	--	--	C	0.01144	C	0.007393	--	--	C	0.06773
mt3010	rRNA	--	A	0.05035	A	0.3186	A	0.1034	A	0.2279	A	0.008432	A	0.1721
mt3308	MT-ND1	non-syn:M-T	C	0.09735	C	0.00121	C	0.00593	C	0.005049	--	--	C	0.02728
mt3450	MT-ND1	syn:P-P	T	0.06227	--	--	T	0.004661	T	0.003917	--	--	T	0.0176
mt3480	MT-ND1	syn:K-K	G	0.002977	--	--	G	0.0182	G	0.0864	--	--	G	0.02356
mt3547	MT-ND1	non-syn:I-V	G	0.001653	--	--	G	0.2394	G	0.01166	--	--	G	0.05039
mt3594	MT-ND1	syn:V-V	C	0.4523	--	--	T	0.02755	T	0.0155	--	--	T	0.149
mt3918	MT-ND1	syn:E-E	A	0.06316	A	0.00121	A	0.01017	A	0.005043	--	--	A	0.01988
mt3927	MT-ND1	syn:L-L	G	0.007275	--	--	G	0.001693	--	--	--	--	G	0.00218
mt4104	MT-ND1	syn:L-L	A	0.4506	G	0.002192	G	0.02765	G	0.0159	--	--	G	0.151
mt4216	MT-ND1	non-syn:Y-H	C	0.01729	C	0.004854	C	0.01489	C	0.189	--	--	C	0.05009
mt4248	MT-ND1	syn:I-I	C	0.004299	C	0.06356	C	0.3621	C	0.01551	--	--	C	0.09461
mt4386	tRNA	--	C	0.001324	C	0.1455	C	0.00127	--	--	C	0.006734	C	0.04153
mt4529	MT-ND2	syn:T-T	T	0.002645	--	--	--	--	T	0.02987	--	--	T	0.007294
mt4586	MT-ND2	syn:A-A	C	0.04548	--	--	C	0.001694	C	0.001169	--	--	C	0.01215
mt4655	MT-ND2	syn:T-T	A	0.0281	A	0.02783	A	0.002116	A	0.001162	--	--	A	0.01551
mt4715	MT-ND2	syn:G-G	G	0.002989	G	0.01699	G	0.1551	G	0.005964	--	--	G	0.03734
mt4769	MT-ND2	syn:M-M	A	0.001323	--	--	A	0.005927	A	0.02442	A	0.3492	A	0.02433
mt4820	MT-ND2	syn:E-E	A	0.004674	A	0.0421	A	0.2361	A	0.01086	--	--	A	0.06196
mt4824	MT-ND2	non-syn:T-A	G	0.005302	G	0.06084	G	0.3579	G	0.01551	--	--	G	0.09324
mt4883	MT-ND2	syn:P-P	T	0.001653	T	0.3472	T	0.06898	T	0.005426	T	0.01178	T	0.1121
mt4917	MT-ND2	non-syn:N-D	G	0.005289	--	--	G	0.005501	G	0.1009	--	--	G	0.02474
mt4958	MT-ND2	syn:M-M	G	0.001984	G	0.1419	--	--	--	--	G	0.006734	G	0.04034
mt5096	MT-ND2	syn:I-I	C	0.03675	--	--	C	0.001697	--	--	--	--	C	0.009743
mt5108	MT-ND2	syn:T-T	C	0.005952	C	0.06873	C	0.00127	C	0.001552	--	--	C	0.02114
mt5147	MT-ND2	syn:T-T	A	0.0935	A	0.05373	A	0.01572	A	0.05474	--	--	A	0.0539
mt5178	MT-ND2	syn:L-L	A	0.001653	A	0.3476	A	0.06898	A	0.005812	A	0.01178	A	0.1123
mt5393	MT-ND2	syn:S-S	C	0.08033	--	--	C	0.005078	C	0.005037	--	--	C	0.02246
mt5417	MT-ND2	syn:Q-Q	--	--	A	0.06566	A	0.003809	--	--	--	--	A	0.01929
mt5465	MT-ND2	syn:L-L	C	0.003653	C	0.02705	--	--	C	0.00466	T	0.05565	C	0.05665
mt5773	tRNA	--	A	0.07081	A	0.01665	A	0.01656	A	0.00972	--	--	A	0.02831
mt5951	MT-CO1	syn:G-G	G	0.08846	G	0.003629	G	0.003809	--	--	--	--	G	0.02452
mt6221	MT-CO1	syn:P-P	C	0.1244	C	0.006048	C	0.01696	C	0.02481	--	--	C	0.04169
mt6455	MT-CO1	syn:F-F	T	0.004628	T	0.2001	--	--	T	0.002712	T	0.01347	T	0.05811
mt6473	MT-CO1	syn:I-I	T	0.001325	--	--	T	0.2419	T	0.0114	--	--	T	0.05095
mt6719	MT-CO1	syn:G-G	C	0.004964	C	0.003632	C	0.00339	C	0.00662	T	0.05952	C	0.05092
mt6827	MT-CO1	syn:A-A	C	0.09461	--	--	C	0.005078	C	0.005439	--	--	C	0.02621
mt6905	MT-CO1	syn:W-W	G	0.001657	--	--	--	--	G	0.001962	G	0.1098	G	0.00642
mt7028	MT-CO1	syn:A-A	C	0.0106	C	0.002117	C	0.05808	C	0.3966	C	0.005051	C	0.1009
mt7055	MT-CO1	syn:G-G	G	0.1718	--	--	G	0.008887	G	0.009299	--	--	G	0.04771
mt7146	MT-CO1	non-syn:T-A	G	0.2504	--	--	G	0.01191	G	0.00737	--	--	G	0.06787
mt7175	MT-CO1	syn:T-T	C	0.1914	--	--	C	0.01101	C	0.006996	--	--	C	0.05265
mt7196	MT-CO1	syn:L-L	A	0.003662	A	0.01694	A	0.1583	A	0.005045	--	--	A	0.03831
mt7256	MT-CO1	syn:N-N	C	0.454	T	0.001516	T	0.02762	T	0.01512	--	--	T	0.1485
mt7274	MT-CO1	syn:N-N	T	0.1881	--	--	T	0.01108	T	0.00661	--	--	T	0.05169
mt7389	MT-CO1	non-syn:Y-N	C	0.2027	C	0.0127	C	0.01227	C	0.005812	--	--	C	0.05902
mt7521	tRNA	--	G	0.4526	A	0.006081	A	0.03366	A	0.0206	--	--	A	0.152
mt7771	MT-CO2	syn:E-E	G	0.1938	--	--	G	0.01101	G	0.006974	--	--	G	0.05357
mt7867	MT-CO2	syn:S-S	T	0.0941	T	0.02952	T	0.005504	T	0.005072	--	--	T	0.03427
mt8027	MT-CO2	non-syn:A-T	A	0.1125	A	0.00121	A	0.3625	A	0.01862	--	--	A	0.1059
mt8248	MT-CO2	syn:M-M	G	0.09407	--	--	G	0.005087	G	0.005037	--	--	G	0.02593
mt8251	MT-CO2	syn:G-G	A	0.02315	A	0.01725	A	0.004655	A	0.06245	--	--	A	0.02525
mt8414	MT-ATP8	non-syn:L-F	T	0.001658	T	0.3073	T	0.06757	T	0.005426	T	0.006734	T	0.1003
mt8468	MT-ATP8	syn:L-L	T	0.2483	--	--	T	0.01185	T	0.007364	--	--	T	0.06724
mt8563	MT-ATP8	ATP8:P-P	--	--	G	0.0366	--	--	G	0.001937	--	--	G	0.0109
mt8618	MT-ATP6	non-syn:I-T	C	0.06828	C	0.007264	C	0.003394	C	0.002726	--	--	C	0.02084
mt8655	MT-ATP6	syn:I-I	T	0.2507	--	--	T	0.01143	T	0.007364	--	--	T	0.06783
mt8697	MT-ATP6	syn:M-M	A	0.005956	--	--	A	0.005511	A	0.09969	--	--	A	0.02461
mt8701	MT-ATP6	non-syn:T-S	A	0.05296	A	0.3611	G	0.2747	G	0.04307	G	0.03199	G	0.485
mt8794	MT-ATP6	non-syn:H-Y	T	0.003311	T	0.06025	T	0.3591	T	0.0155	--	--	T	0.09276
mt8964	MT-ATP6	syn:T-T	--	--	T	0.0663	--	--	--	--	T	0.008418	T	0.01887
mt9042	MT-ATP6	syn:H-H	T	0.04795	--	--	T	0.00254	T	0.00155	--	--	T	0.013
mt9123	MT-ATP6	syn:L-L	A	0.00397	A	0.02663	A	0.001271	A	0.01746	G	0.05922	A	0.05917
mt9221	MT-CO3	syn:S-S	G	0.2948	--	--	G	0.01612	G	0.008939	--	--	G	0.08051
mt9296	MT-CO3	syn:G-G	--	--	T	0.04294	--	--	--	--	--	--	T	0.01224
mt9449	MT-CO3	syn:Y-Y	T	0.0689	T	0.001215	T	0.007617	T	0.003503	--	--	T	0.02035
mt9477	MT-CO3	non-syn:V-I	A	0.007608	A	0.00726	A	0.007617	A	0.07677	A	0.006734	A	0.02256
mt9540	MT-CO3	syn:L-L	T	0.04634	T	0.3397	C	0.2797	C	0.04461	C	0.03199	C	0.494
mt9698	MT-CO3	syn:L-L	C	0.003309	--	--	C	0.0165	C	0.08999	--	--	C	0.02391
mt9755	MT-CO3	syn:E-E	A	0.05026	A	0.02117	A	0.004234	A	0.007752	--	--	A	0.02113
mt9818	MT-CO3	syn:H-H	T	0.04729	--	--	T	0.002541	T	0.00155	--	--	T	0.01284
mt9950	MT-CO3	syn:V-V	C	0.0546	C	0.0345	C	0.2443	C	0.009686	--	--	C	0.07406
mt9966	MT-CO3	non-syn:V-L	A	0.02489	--	--	--	--	A	0.004657	--	--	A	0.007644
mt10086	MT-ND3	non-syn:N-D	G	0.06835	--	--	G	0.005096	G	0.002718	--	--	G	0.01925
mt10115	MT-ND3	syn:I-I	C	0.2986	--	--	C	0.01609	C	0.008534	--	--	C	0.08146
mt10238	MT-ND3	syn:I-I	C	0.007292	C	0.01821	C	0.001699	C	0.04368	T	0.05902	C	0.06372
mt10373	MT-ND3	syn:E-E	A	0.05421	A	0.003931	A	0.007194	A	0.005424	--	--	A	0.01777
mt10398	MT-ND3	non-syn:T-S	A	0.04467	A	0.295	G	0.3004	G	0.2271	G	0.03879	A	0.4487
mt10400	MT-ND3	syn:T-T	T	0.01609	C	0.3405	T	0.2317	T	0.0161	T	0.03204	T	0.2379
mt10463	tRNA	--	C	0.006642	C	0.003344	C	0.005106	C	0.09294	--	--	C	0.02396
mt10550	MT-ND4L	syn:M-M	G	0.002984	--	--	G	0.01608	G	0.08495	--	--	G	0.02268
mt10589	MT-ND4L	syn:L-L	A	0.05033	A	0.001816	A	0.002539	A	0.01201	--	--	A	0.01636
mt10688	MT-ND4L	syn:V-V	A	0.2515	--	--	A	0.01144	A	0.007373	--	--	A	0.06799
mt10810	MT-ND4	syn:L-L	C	0.2507	--	--	C	0.01354	C	0.008911	--	--	C	0.06875
mt10819	MT-ND4	syn:K-K	G	0.1792	--	--	G	0.006369	G	0.01202	--	--	G	0.04966
mt10873	MT-ND4	syn:P-P	T	0.04634	T	0.3366	C	0.2799	C	0.04309	C	0.03199	C	0.4947
mt10915	MT-ND4	syn:C-C	C	0.05793	C	0.005761	C	0.009901	C	0.01015	--	--	C	0.02033
mt11016	MT-ND4	non-syn:S-N	A	0.002657	A	0.01453	A	0.02118	A	0.004278	--	--	A	0.009832
mt11084	MT-ND4	non-syn:T-P	--	--	G	0.1167	--	--	G	0.002721	G	0.0101	G	0.0335
mt11176	MT-ND4	syn:Q-Q	A	0.04798	--	--	A	0.008478	A	0.004657	--	--	A	0.01513
mt11177	MT-ND4	non-syn:P-T	T	0.001323	--	--	T	0.2405	T	0.00969	--	--	T	0.05023
mt11251	MT-ND4	syn:L-L	G	0.007939	G	0.001814	G	0.01397	G	0.1843	--	--	G	0.04562
mt11299	MT-ND4	syn:T-T	C	0.005622	--	--	C	0.01527	C	0.08034	--	--	C	0.02235
mt11302	MT-ND4	syn:L-L	T	0.03175	--	--	--	--	--	--	--	--	T	0.008386
mt11467	MT-ND4	syn:L-L	G	0.01289	--	--	G	0.03343	G	0.218	G	0.01014	G	0.05804
mt11719	MT-ND4	syn:G-G	G	0.009275	G	0.002433	G	0.06582	G	0.4416	G	0.005051	G	0.1126
mt11812	MT-ND4	syn:L-L	G	0.00463	--	--	G	0.00508	G	0.07146	--	--	G	0.01788
mt11914	MT-ND4	syn:T-T	A	0.2729	A	0.04857	A	0.1922	A	0.04799	--	--	A	0.132
mt11944	MT-ND4	syn:L-L	C	0.2927	C	0.01641	C	0.01533	C	0.009716	--	--	C	0.08441
mt12007	MT-ND4	syn:W-W	A	0.05403	A	0.004237	A	0.3639	A	0.02716	--	--	A	0.09364
mt12236	tRNA	--	A	0.09226	--	--	A	0.006351	--	--	--	--	A	0.02499
mt12239	tRNA	--	T	0.003316	T	0.001512	--	--	T	0.003874	C	0.05405	T	0.04926
mt12308	tRNA	--	G	0.01296	--	--	G	0.03356	G	0.2172	G	0.01012	G	0.05787
mt12358	MT-ND5	non-syn:T-A	G	0.002975	G	0.05298	G	0.00127	G	0.001937	G	0.006734	G	0.01643
mt12372	MT-ND5	syn:L-L	A	0.01356	A	0.04297	A	0.03641	A	0.2196	A	0.01515	A	0.07111
mt12406	MT-ND5	non-syn:V-I	A	0.01522	A	0.04591	A	0.006356	A	0.001939	A	0.01012	A	0.01873
mt12519	MT-ND5	syn:V-V	C	0.09392	--	--	C	0.00508	C	0.006204	--	--	C	0.02616
mt12612	MT-ND5	syn:V-V	G	0.006293	G	0.003937	G	0.008493	G	0.08627	--	--	G	0.02316
mt12633	MT-ND5	syn:S-S	A	0.001323	--	--	A	0.002124	A	0.02366	--	--	A	0.006086
mt12693	MT-ND5	syn:S-S	G	0.1935	--	--	G	0.0106	G	0.006979	--	--	G	0.0532
mt12705	MT-ND5	syn:I-I	C	0.04195	C	0.213	C	0.3625	T	0.133	T	0.03547	C	0.3815
mt12771	MT-ND5	syn:E-E	A	0.005622	A	0.144	A	0.00212	A	0.003885	A	0.008418	A	0.04313
mt12811	MT-ND5	non-syn:Y-H	--	--	C	0.05051	C	0.02457	C	0.003102	C	0.006734	C	0.02005
mt13105	MT-ND5	non-syn:I-V	G	0.4215	G	0.01576	G	0.0301	G	0.02028	--	--	G	0.1222
mt13263	MT-ND5	syn:Q-Q	G	0.004299	G	0.005141	G	0.157	G	0.00814	--	--	G	0.03555
mt13276	MT-ND5	non-syn:M-V	G	0.04697	--	--	G	0.002539	G	0.00155	--	--	G	0.01275
mt13368	MT-ND5	syn:G-G	A	0.009927	--	--	A	0.008898	A	0.09891	--	--	A	0.02609
mt13485	MT-ND5	syn:M-M	G	0.1078	--	--	G	0.003809	--	--	--	--	G	0.02851
mt13506	MT-ND5	syn:Y-Y	T	0.2512	--	--	T	0.01147	T	0.007407	--	--	T	0.06787
mt13590	MT-ND5	syn:L-L	A	0.302	A	0.04265	A	0.2569	A	0.02095	--	--	A	0.1447
mt13650	MT-ND5	syn:P-P	C	0.4536	--	--	T	0.02752	T	0.01512	--	--	T	0.1488
mt13708	MT-ND5	non-syn:A-T	A	0.01323	A	0.03304	A	0.01908	A	0.1027	--	--	A	0.03884
mt13789	MT-ND5	non-syn:Y-H	C	0.1997	--	--	C	0.008898	C	0.005816	--	--	C	0.05397
mt13803	MT-ND5	syn:T-T	G	0.1926	--	--	G	0.011	G	0.006977	--	--	G	0.05299
mt13880	MT-ND5	non-syn:S-Y	A	0.07911	--	--	A	0.005093	A	0.004649	--	--	A	0.02207
mt13928	MT-ND5	non-syn:S-T	C	0.04506	C	0.06489	C	0.006353	C	0.003491	--	--	C	0.03158
mt14000	MT-ND5	non-syn:L-Q	A	0.1088	--	--	A	0.003809	A	0.001162	--	--	A	0.029
mt14022	MT-ND5	syn:L-L	G	0.005293	--	--	--	--	G	0.004265	A	0.05782	G	0.04909
mt14167	MT-ND6	syn:E-E	T	0.002975	--	--	T	0.01567	T	0.08353	--	--	T	0.02224
mt14178	MT-ND6	non-syn:I-V	C	0.2048	C	0.004838	C	0.01354	C	0.006204	--	--	C	0.05778
mt14212	MT-ND6	syn:V-V	C	0.1735	--	--	C	0.00891	C	0.00897	--	--	C	0.04797
mt14284	MT-ND6	syn:E-E	T	0.0715	--	--	T	0.005078	T	0.00155	--	--	T	0.01988
mt14318	MT-ND6	non-syn:N-S	C	0.003636	C	0.00484	C	0.157	C	0.005037	--	--	C	0.03462
mt14364	MT-ND6	syn:L-L	A	0.002646	A	0.1404	A	0.02418	A	0.005814	A	0.006745	A	0.04606
mt14566	MT-ND6	syn:G-G	G	0.1867	--	--	G	0.011	G	0.006974	--	--	G	0.05149
mt14668	MT-ND6	syn:M-M	T	0.002647	T	0.3165	T	0.07025	T	0.006199	T	0.008418	T	0.1041
mt14766	MT-CYB	non-syn:T-S	C	0.01058	C	0.002721	C	0.0711	C	0.4425	C	0.005051	C	0.1141
mt14769	MT-CYB	non-syn:N-T	G	0.1461	--	--	G	0.008511	G	0.006226	--	--	G	0.04011
mt14783	MT-CYB	non-syn:N-T	C	0.01721	T	0.3395	C	0.2335	C	0.01668	C	0.03204	C	0.2401
mt14905	MT-CYB	syn:M-M	A	0.1058	--	--	A	0.008464	A	0.09841	--	--	A	0.0503
mt14911	MT-CYB	syn:Y-Y	T	0.1049	--	--	T	0.00381	--	--	--	--	T	0.02809
mt14944	MT-CYB	syn:I-I	--	--	T	0.01754	--	--	--	--	--	--	T	0.004863
mt15043	MT-CYB	syn:G-G	A	0.03096	G	0.3455	A	0.2241	A	0.05564	A	0.03209	A	0.2462
mt15110	MT-CYB	non-syn:A-T	A	0.1066	--	--	A	0.007624	A	0.003876	--	--	A	0.0297
mt15136	MT-CYB	syn:G-G	T	0.04732	--	--	T	0.002539	T	0.001556	--	--	T	0.01286
mt15223	MT-CYB	syn:D-D	T	0.00331	T	0.02874	--	--	--	--	--	--	T	0.008889
mt15301	MT-CYB	syn:L-L	G	0.2911	G	0.3378	A	0.269	A	0.04149	A	0.03199	A	0.4293
mt15311	MT-CYB	non-syn:I-V	G	0.06182	--	--	G	0.004657	G	0.002712	--	--	G	0.01735
mt15535	MT-CYB	syn:N-N	T	0.001322	T	0.04416	T	0.2397	T	0.009686	--	--	T	0.06232
mt15607	MT-CYB	syn:K-K	G	0.007603	--	--	G	0.006353	G	0.09581	--	--	G	0.0244
mt15629	MT-CYB	syn:L-L	C	0.04666	--	--	C	0.0072	C	0.001162	--	--	C	0.01384
mt15746	MT-CYB	non-syn:I-V	G	0.003306	G	0.007564	--	--	G	0.003877	A	0.05565	G	0.05082
mt15784	MT-CYB	syn:P-P	C	0.2124	C	0.006955	C	0.0165	C	0.01202	--	--	C	0.06222
mt15824	MT-CYB	non-syn:T-A	G	0.06722	--	--	G	0.00508	G	0.003102	--	--	G	0.01897
mt15904	tRNA	--	T	0.001323	--	--	T	0.007197	T	0.02561	--	--	T	0.007639
mt15924	tRNA	--	G	0.02483	G	0.01483	G	0.01442	G	0.06277	G	0.005051	G	0.02719
mt15928	tRNA	--	A	0.005057	A	0.002456	A	0.006637	A	0.09516	A	0.005059	A	0.02449
*MAF was calculated in controls.
