# Supplementary material for: Association of Genes, Pathways, and Haplogroups of the Mitochondrial Genome with the Risk of Colorectal Cancer: The Multiethnic Cohort
Source: PLoS One. 2015 Sep 4;10(9):e0136796. doi: 10.1371/journal.pone.0136796 (PMC4560485; doi:10.1371/journal.pone.0136796)
Supplement: S3 Table — (XLSX) [file pone.0136796.s003.xlsx]

## Sheet: S3 Table
S3a Table. mtDNA complex and gene based models of CRC risk in European Americans.
Complex I*	No. of mtSNPs	No. of mtSNPs with MAF>=0.01	P value
Model 1	80	32	0.025
Model 2	66	27	0.0703043
Model 3	77	30	0.058687
Model 4	58	26	0.0406418
Model 5	22	6	0.0245659
*Model 1, all mitochondrial genes in the complex I
Model 2, all mitochondrial genes except MT-ND2 gene in the complex I
Model 3, all mitochondrial genes without the 3 significant SNPs (mt4655, mt5147, mt4917) in the MT-ND2 genes in the complex I.
Model 4, synonymous SNPs in the complex I.
Model 5, non-snonymous SNPs in the complex l.
S3b Table. mtDNA complex and gene based models of CRC risk in European Americans.
MT-ND2#	No. of mtSNPs	No. of mtSNPs with MAF>=0.01	P value
Model 1	14	5	0.00140763
Model 2	12	3	0.00597502
Model 3	2	2	0.00815795
#Model 1, all SNPs in the MT-ND2 gene.
Model 2, synonymous SNPs only in the MT-ND2 gene.
Model 3, non-synonymous SNPs only in the MT-ND2 gene.
